# Supplementary material for: Allostatic Changes in the cAMP System Drive Opioid-Induced Adaptation in Striatal Dopamine Signaling
Source: PubMed Central journal article supplement (PMC6871051; doi:10.1016/j.celrep.2019.09.034), 2019-10-22
Supplement: NIHMS1542692-supplement-1.pdf [file NIHMS1542692-supplement-1.pdf]

**Cell Reports, Volume 29**

**Supplemental Information**

**Allostatic Changes in the cAMP System**

**Drive Opioid-Induced Adaptation**

**in Striatal Dopamine Signaling**

**Brian S. Muntean, Maria T. Dao, and Kirill A. Martemyanov**

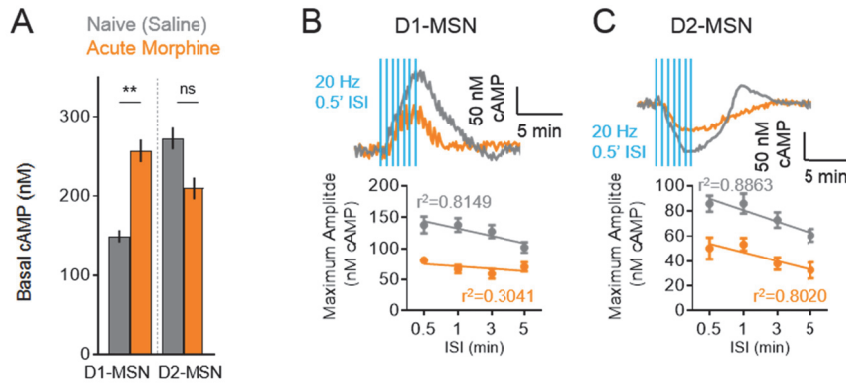

**Figure S1. Acute morphine exposure alters kinetic dopamine-mediated signaling parameters in MSNs, Related to Figure 1.** **A**, Baseline cAMP level prior to experimental manipulations in genetically defined striatal subpopulations. Naive D1-MSN  $149.4 \pm 7.8$  nM cAMP (n=51 neurons) vs Acute D1-MSN  $272.3 \pm 13.9$  nM cAMP (n=41 neurons); t-test  $p < 0.0001$ , Kolmogorov-Smirnov  $D=0.6585$ . Naive D2-MSN  $256.6 \pm 14.1$  nM cAMP (n=47 neurons) vs Acute D2-MSN  $210.7 \pm 12.9$  nM cAMP (n=40 neurons); t-test  $p=0.1521$ , Kolmogorov-Smirnov  $D=0.2441$ . **B**, cAMP responses in D1-MSN from 20 Hz stimulation presented at 0.5 minute inter-stimulation intervals (ISI). Maximum cAMP amplitude from varying ISI protocols were quantified. **C**, cAMP responses in D2-MSN from 20 Hz stimulation presented at 0.5 minute inter-stimulation intervals (ISI). Maximum cAMP amplitude from varying ISI protocols were quantified.

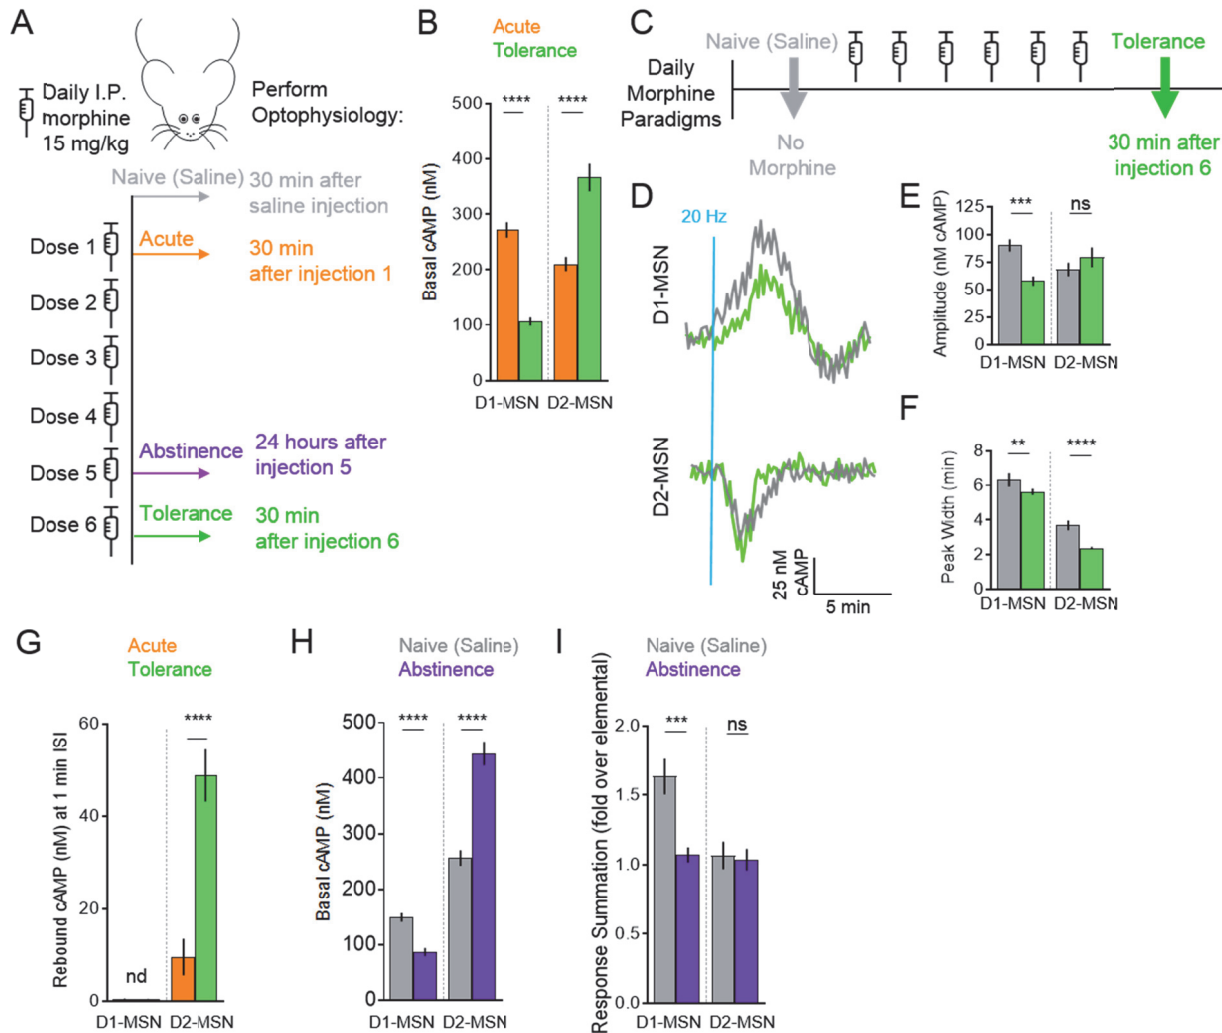

**Figure S2. Intrinsic neuroadaptive changes in MSNs following exposure to opioids, Related to Figure 2.** **A**, Schematic of four morphine paradigms utilized. **B**, Baseline cAMP level. Acute D1-MSN  $272.3 \pm 13.9$  nM cAMP ( $n=41$  neurons) vs Tolerance D1-MSN  $106.4 \pm 7.3$  nM cAMP ( $n=39$  neurons); t-test  $p<0.0001$ , KS  $D=0.8049$ . Acute D2-MSN  $210.7 \pm 12.9$  nM cAMP ( $n=40$  neurons) vs Tolerance D2-MSN  $366.6 \pm 25.3$  nM cAMP ( $n=46$  neurons); t-test  $p<0.0001$ , KS  $D=0.5435$ . **C**, Experimental design to compare six daily morphine injections (Tolerance) with saline treatment (Naive). **D**, cAMP response from optical stimulation. **E**, Max amplitude cAMP change. Naive D1-MSN  $90.3 \pm 5.5$  nM cAMP ( $n=51$  neurons; 7 mice) vs Tolerance D1-MSN  $58 \pm 4.5$  nM cAMP ( $n=39$  neurons; 4 mice); t-test  $p=0.0004$ , KS  $D=0.4419$ . Naive D2-MSN  $68.5 \pm 6.1$  nM cAMP ( $n=47$  neurons; 6 mice) vs Tolerance D2-MSN  $80 \pm 5.4$  nM cAMP ( $n=46$  neurons; 5 mice); t-test  $p=0.1053$ , KS  $D=0.2516$ . **F**, Response duration. Naive D1-MSN  $6.3 \pm 0.39$  minutes ( $n=51$  neurons; 7 mice) vs Tolerance D1-MSN  $5.6 \pm 0.19$  minutes ( $n=39$  neurons; 4 mice); t-test  $p=0.0017$ , KS  $D=0.3997$ . Naive D2-MSN  $3.7 \pm 0.27$  minutes ( $n=47$  neurons; 6 mice) vs Tolerance D2-MSN  $2.4 \pm 0.07$  minutes ( $n=46$  neurons; 5 mice); t-test  $p<0.0001$ , KS  $D=0.5747$ . **G**, Max amplitude cAMP change in opposite direction of the initial response before returning to baseline. Acute D1-MSN  $0.35 \pm 0.02$  nM cAMP ( $n=41$  neurons) vs Tolerance D1-MSN  $0.39 \pm 0.03$  nM cAMP ( $n=39$  neurons); t-test  $p=0.0701$ , KS  $D=0.2896$ . Acute D2-MSN  $9.6 \pm 3.9$  nM cAMP ( $n=40$  neurons) vs Tolerance D2-MSN  $49.3 \pm 5.6$  nM cAMP ( $n=46$  neurons); t-test  $p<0.0001$ , KS  $D=0.9783$ . **H**, Baseline cAMP level. Naive D1-MSN  $149.4 \pm 7.8$  nM cAMP ( $n=51$  neurons) vs Abstinence D1-MSN  $86.6 \pm 7.6$  nM cAMP ( $n=35$  neurons); t-test  $p<0.0001$ , KS  $D=0.5272$ . Naive D2-MSN  $256.6 \pm 14.1$  nM cAMP ( $n=47$  neurons) vs Abstinence D2-MSN  $444.0 \pm 21.2$  nM cAMP ( $n=38$  neurons); t-test  $p<0.0001$ , KS  $D=0.692$ . **I**, Summation of the cAMP response from 3' ISI data calculated by dividing max response by peak response to initial stimulation. Naive D1-MSN  $1.63 \pm 0.13$  fold ( $n=16$  neurons) vs Abstinence D1-MSN  $1.07 \pm 0.054$  fold ( $n=12$  neurons); t-test  $p=0.0009$ , KS  $D=0.75$ . Naive D2-MSN  $1.07 \pm 0.099$  fold ( $n=18$  neurons) vs Abstinence D2-MSN  $1.04 \pm 0.079$  fold ( $n=16$  neurons); t-test  $p=0.8558$ , KS  $D=0.75$ .

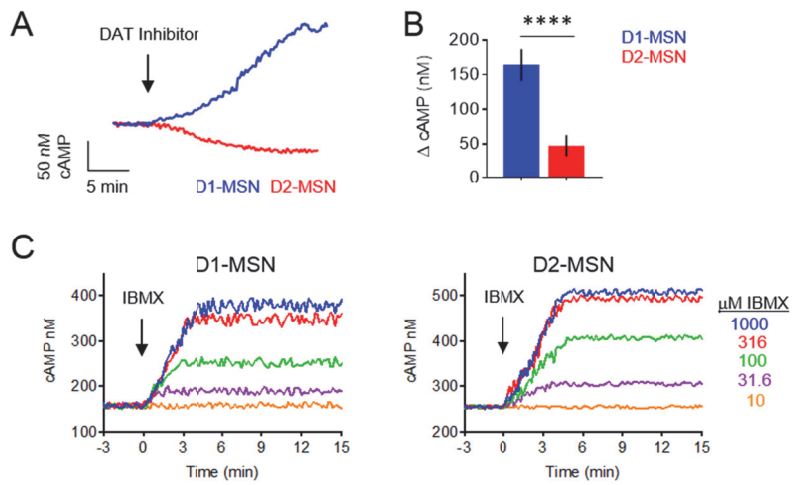

**Figure S3. DAT and PDE inhibition influence basal cAMP level in MSNs, Related to Figure 3.** **A**, cAMP response to bath application of DAT inhibitor (cocaine, 10  $\mu$ M). **B**, Maximum amplitude cAMP change induced by cocaine. D1-MSN  $164 \pm 23$  nM cAMP (n=41 neurons) vs D2-MSN  $47 \pm 16$  nM cAMP (n= 55 neurons); t-test  $p < 0.0001$ . **C**, cAMP response to bath application of nonspecific PDE inhibitor (IBMX).

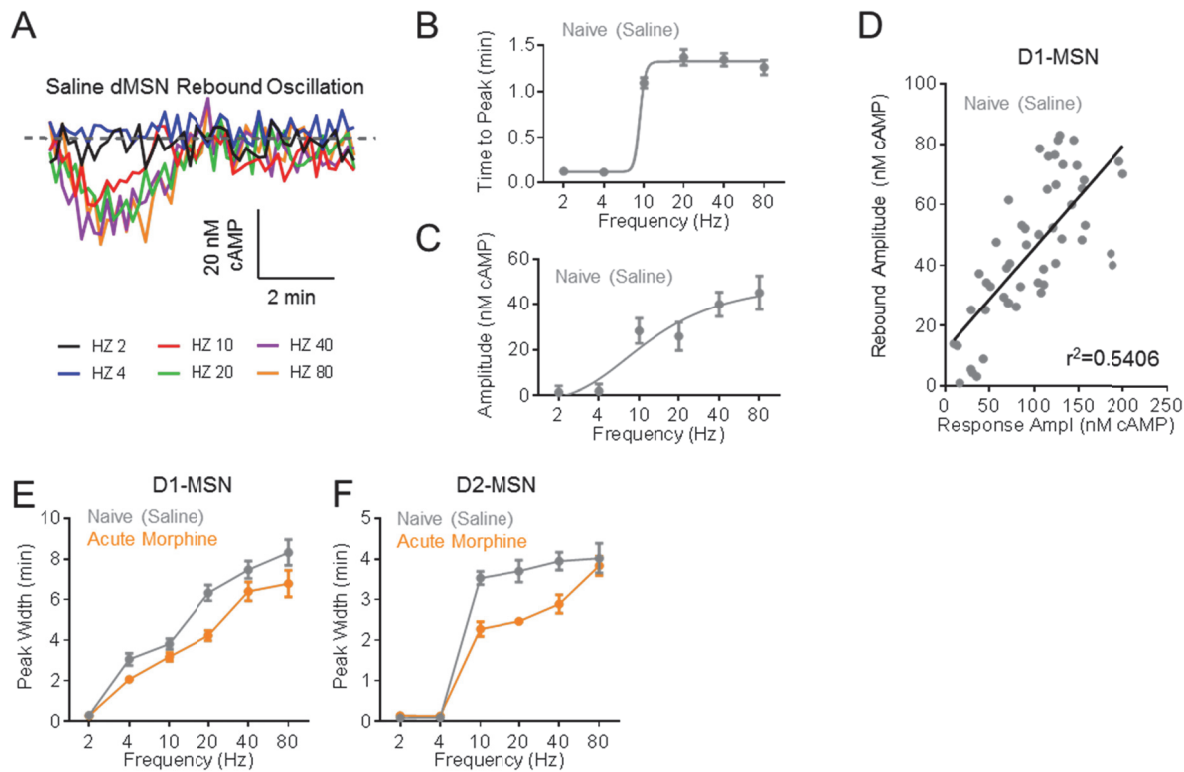

**Figure S4. Stimulation frequency influence on cAMP rebound oscillation and response kinetics, Related to Figure 5.** **A**, cAMP change in D1-MSN in the opposite direction of the initial response before returning to baseline. Traces highlight rebound cAMP from data from Fig. 5b. **B**, Time to peak for cAMP rebound in D1-MSN Saline from varying stimulation frequencies. **C**, Maximum cAMP rebound amplitude in D1-MSN Saline from varying stimulation frequencies. **D**, Correlation of cAMP rebound and initial response amplitude in D1-MSN Saline at 80 Hz stimulation. **E**, Peak width of cAMP response from varying stimulation frequencies in D1-MSN. **F**, Peak width of cAMP response from varying stimulation frequencies in D2-MSN.

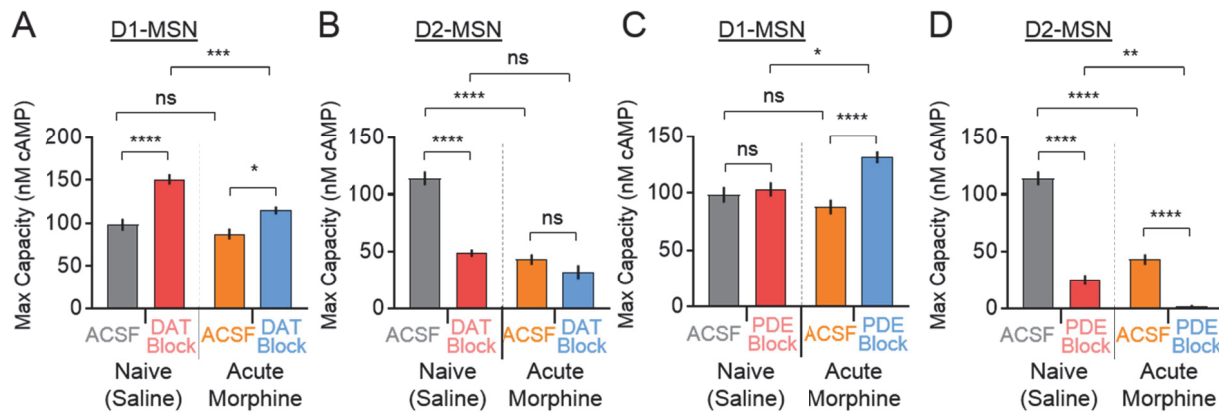

**Figure S5. Regulation of maximum signaling capacity by DAT and PDE, Related to Figure 6.** Maximum amplitude cAMP change at 80 Hz stimulation frequency. **A**, D1-MSN Naive ACSF  $98.44 \pm 6.90$  nM cAMP, D1-MSN Naive DAT block  $151.17 \pm 5.85$  nM cAMP, D1-MSN Opioid ACSF  $87.90 \pm 6.25$  nM cAMP, D1-MSN Opioid DAT block  $114.85 \pm 4.37$  nM cAMP. **B**, D2-MSN Naive ACSF  $113.52 \pm 6.15$  nM cAMP, D2-MSN Naive DAT block  $49.10 \pm 3.25$  nM cAMP, D2-MSN Opioid ACSF  $43.31 \pm 4.32$  nM cAMP, D2-MSN Opioid DAT block  $33.43 \pm 5.27$  nM cAMP. **C**, D1-MSN Naive ACSF  $98.44 \pm 6.90$  nM cAMP, D1-MSN Naive PDE block  $103.14 \pm 6.05$  nM cAMP, D1-MSN Opioid ACSF  $87.90 \pm 6.25$  nM cAMP, D1-MSN Opioid PDE block  $131.08 \pm 5.52$  nM cAMP. **D**, D2-MSN Naive ACSF  $113.52 \pm 6.15$  nM cAMP, D2-MSN Naive PDE block  $24.74 \pm 3.50$  nM cAMP, D2-MSN Opioid ACSF  $43.31 \pm 4.32$  nM cAMP, D2-MSN Opioid PDE block  $2.09 \pm 0.15$  nM cAMP. Two-way ANOVA; ns  $p > 0.05$ , \*  $p < 0.05$ , \*\*  $p < 0.01$ , \*\*\*  $p < 0.001$ , \*\*\*\*  $p < 0.0001$ .

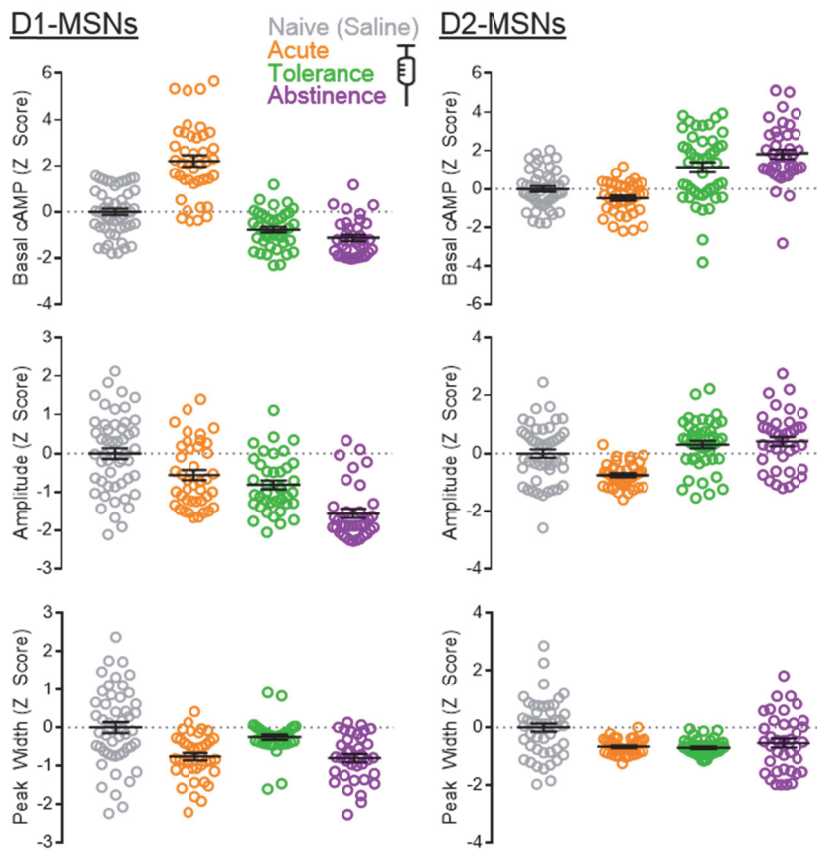

**Figure S6. Z score MSN signaling parameters, Related to Figure 7.** Individual Z score data normalized to Naive condition for basal cAMP, response amplitude, and peak width in both D1-MSN and D2-MSN.
